# Supplementary material for: Personal exposure to PM 2.5 emitted from typical anthropogenic sources in southern West Africa: chemical characteristics and associated health risks
Source: Copernicus journal article supplement (doi:10.5194/acp-19-6637-2019), 2019-05-20
Supplement: Supplementary file 1 [file acp-19-6637-2019-supplement.pdf]

Supplement of Atmos. Chem. Phys., 19, 6637–6657, 2019  
<https://doi.org/10.5194/acp-19-6637-2019-supplement>  
© Author(s) 2019. This work is distributed under  
the Creative Commons Attribution 4.0 License.

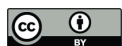

Atmospheric  
Chemistry  
and Physics  
Open Access  
EGU

*Supplement of*

## **Personal exposure to PM<sub>2.5</sub> emitted from typical anthropogenic sources in southern West Africa: chemical characteristics and associated health risks**

**Hongmei Xu et al.**

*Correspondence to:* Hongmei Xu (xuhongmei@xjtu.edu.cn) and Cathy Liousse (cathy.leal-liousse@aero.obs-mip.fr)

The copyright of individual parts of the supplement might differ from the CC BY 4.0 License.

**Figure S1.** Household cooking stoves and tools used in the target households: (a) Simple coal-burning stove and pot; (b) Another type simple coal-burning stove and jar; (c) Butane gas stove and pot; (d) Simple wood-burning stove (three pieces of stones) and pot.

**SI A-C.** Questionnaires for (A) women, (B) students and (C) drivers.

**SI D.** Activity diaries for women, students and drivers.

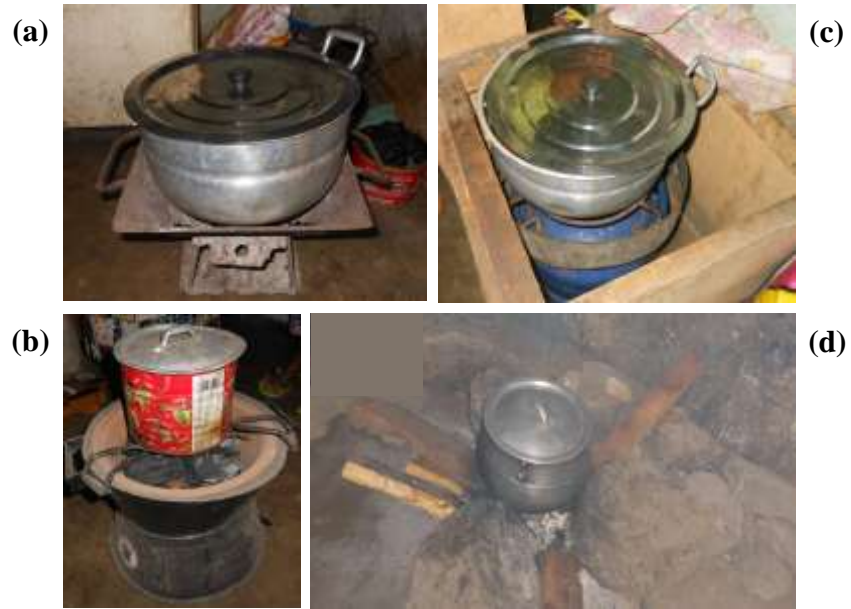

**Figure S1.**

**2016**

**Assessing Air Pollution Exposures in southern West Africa  
- Questionnaire for Women**

1. Participant name: \_\_\_\_\_
2. Interviewer name: \_\_\_\_\_
3. Sampling site: \_\_\_\_\_
4. Address of the interview place: \_\_\_\_\_  
\_\_\_\_\_
5. Address of the participant home: \_\_\_\_\_  
\_\_\_\_\_
6. Interview date: \_\_\_\_/\_\_\_\_/\_\_\_\_ (yyyy/mm/dd)
7. Interview start time: \_\_\_\_\_ End time: \_\_\_\_\_

**This questionnaire is for research purposes only. Please think carefully and answer all the questions below. Your answers will be kept completely confidential and your personal information will not be disclosed or displayed in any way and any case.**

**Thank you for your cooperation!**

## A. Basic Information

【Please choose by  or fill in the answer】

A1. Gender: (0)  Male (1)  Female

A2. Age: \_\_\_\_\_ years old

A3. Height: \_\_\_\_\_ cm; Weight: \_\_\_\_\_ Kg

A4. Marital status:

(0)  Single (1)  Married

(2)  Divorced (3)  Widowed

A5. Highest level of education:

(0)  Primary school

(1)  Junior high school

(2)  High school

(3)  Undergraduate

(4)  Above undergraduate

A6. The total number of family members (including you): \_\_\_\_\_

A7. Number of adults (18 years or older; including you): \_\_\_\_\_

A8. Family total annual income: \_\_\_\_\_ West African Franc / Month

A9. Now professional:

(0)  Unemployed

(1)  Students

(2)  Retired staff

(3)  Workers

(4)  Farmers

(5)  Corporate staff

(6)  Civil servants

(7)  Housewife

(8)  Driver

(9)  Others: \_\_\_\_\_

A10. Work address (if any)?

\_\_\_\_\_

A11. Your housing type:

(0)  Apartment

(1)  One-storey house

(2)  Other: \_\_\_\_\_

A12. \_\_\_\_\_ Floor

A13. Residential area: \_\_\_\_\_ m<sup>2</sup>

(0)  One room and one hall

(1)  Two rooms and one hall

(2)  Three rooms and two halls

(3)  Others

A14. How long did you move in this house after it was decorated?

(0)  < 3 months (1)  3-6 months

(2)  6-12 months (3)  > 12 months

A15. When was your house built? \_\_\_\_\_(year)

A16. How many years have you lived in this house? \_\_\_\_\_ (year)

A17. What material is your house built?

(0)  Brick (1)  Armored concrete

(2)  Timber (3)  Other materials

A18. What is the material of the floor in your house?

(0)  Cement (1)  Marble

(2)  Solid wood (3)  Composite wood

(4)  Tile (5)  Plastic (6)  Rock

(7)  Brick (8)  Bare soil

A19. What is the material of the furniture in your house?

(0)  Solid wood (1)  Plastic

(2)  Leather (3)  Metal

(4)  Stone (5)  Glass

(6)  Cloth (7)  Artificial board

A20. Has your house been decorated in the last year?

(0)  Yes (1)  No

↳A21. What kind of decoration?

(0)  Paint

(1)  Change the floor

(2)  Add new furniture

(3)  Other: \_\_\_\_\_

A22. Does your house have ventilation

equipment?

- (0)  Yes (1)  No

↳ A23. What kind of equipment?

(Please select all suitable answers)

- (0)  Hanging air conditioner  
(1)  Cabinet air conditioner  
(2)  Ventilator

A24. How far is your house from the main road?

- (0)  <20m (1)  20-100m  
(2)  >100m

A25. Do you smoke?

- (0)  Yes (1)  No

A26. Do you have a smoking history?

- (0)  Yes (1)  No

↳ A27. How long is your smoking

history? \_\_\_\_\_ years

A28. Does your family member smoke (not including you)?

- (0)  Yes (1)  Used to smoke  
(2)  No

A29. In general, are you influenced by second hand smoke in the following environments often?

- (0)  Your own home  
(1)  Working environment  
(2)  Other' house  
(3)  Restaurants, bars, supermarkets,

streets and so on

- (4)  Other: \_\_\_\_\_  
(5)  Rarely affected by second hand

smoke

A30. Do you often drink alcohol?

- (0)  Yes (1)  No (2)  Not often

A31. Drinking type:

- (0)  Alcohol (1)  Beer  
(2)  Wine (3)  Other

A32. Drinking frequency per week:

- (0)  < once (1)  1-3 times  
(2)  > 3 times (3)  I don't know

A33. Please describe your health status in general.

- (0)  Very good (1)  Good  
(2)  Not bad (3)  Not good

A34. Do you have a family history of allergies?

- (0)  Yes (1)  No (2)  I don't know

A35. Have you been allergic to flowers or animals, food, etc.?

- (0)  Yes (1)  No (2)  I don't know

A36. Have you ever had itchy skin and red patches (rashes) lasting more than 6 months?

- (0)  Yes (1)  No (2)  I don't know

A37. Do your parents have asthma?

- (0)  Yes (1)  No (2)  I don't know

A38. Do you have asthma?

- (0)  Yes (1)  No (2)  I don't know

A39. Have you heard any noise or wheeze in your chest (whistle sound) during breathing?

- (0)  Yes (1)  No (2)  I don't know

A40. Have you had symptoms of sneezing, runny nose or stuffy nose in the absence of a cold?

- (0)  Yes (1)  No (2)  I don't know

A41. Are you diagnosed with high blood pressure by your doctor?

- (0)  Yes (1)  No (2)  I don't know

↳ A42. Are you taking antihypertensive drugs every day?

- (0)  Yes (1)  No

A43. Are you diagnosed with diabetes by your doctor?

- (0)  Yes (1)  No (2)  I don't know

A44. Are you diagnosed with a myocardial infarction by your doctor?

- (0)  Yes (1)  No (2)  I don't know

## **B. Environment**

【Please choose by  or fill in the answer】

**B1. Do you cook at home?**

- (0)  Yes      (1)  No

↳ **B2. Cooking frequency per day:**

- (0)  Once      (1)  Twice  
(2)  Three times  
(3)  > Three times

**B3. What kind of fuel is used at home for cooking? (Please select all suitable answers)**

- (0)  Natural gas  
(1)  Coal  
(2)  Liquefied petroleum gas (LPG)  
(3)  Electricity  
(4)  Other: \_\_\_\_\_  
(5)  Don't cook at home

**B4. Does your kitchen have ventilation equipment?**

- (0)  Yes      (1)  No

↳ **B5. What kind of equipment? (Please select all suitable answers)**

- (0)  Kitchen smoke exhaust ventilator  
(1)  Kitchen ventilator  
(2)  Chimney

**B6. Your kitchen area: \_\_\_\_\_ m<sup>2</sup>**

**B7. Do you usually make smoked fish?**

- (0)  Yes      (1)  No

**B8. Where do you usually make smoked fish?**

- (0)  Kitchen at home    (1)  Yard at home  
(2)  Outdoor-working place

**B9. How many times do you make smoked fish per week? \_\_\_\_\_ times**

**B10. How long do you average make the smoked fish each time? \_\_\_\_\_ min**

**B11. When do you usually make smoked fish?**

- (0)  Morning  
(1)  Noon  
(2)  Afternoon  
(3)  Evening

**B12. Do you raise pet at home?**

- (0)  Yes      (1)  No

**B13. Do you grow flowers or plants at home?**

- (0)  Yes      (1)  No

**B14. Do you use insecticide at home?**

- (0)  Yes    (1)  No    (2)  I don't know

**B15. What's the open conditions of your windows at home every day?**

- (0)  Wide open < 1h  
(1)  Wide open > 3h  
(2)  Half open < 1h  
(3)  Half open > 1h  
(4)  Never open

**B16. What tool do you use to clean house?**

- (0)  Broom and mop  
(1)  Electric dust collector

## C. Travel habits

【Please choose by  or fill in the answer】

C1. How much time do you spend indoors per day, except sleeping?

- (0)  > 50%      (1)  = 50%      (2)  < 50%

C2. How much sleep do you have daily, including daytime and nighttime? \_\_\_\_\_ h

C3. What time of the day do you stay in your house in general? (Please select all suitable answers)

| Morning |          | Afternoon |          |          | Evening  |          |          |                    |                    |
|---------|----------|-----------|----------|----------|----------|----------|----------|--------------------|--------------------|
| 8-10 am | 10-12 am | 12-14 pm  | 14-16 pm | 16-18 pm | 18-20 pm | 20-22 pm | 22-24 pm | Next day<br>0-4 am | Nexr day<br>4-8 am |
|         |          |           |          |          |          |          |          |                    |                    |

C4. What time of the day do you stay at your working place in general? (Please select all suitable answers)

| Morning |          | Afternoon |          |          | Evening  |          |          |                    |                    |
|---------|----------|-----------|----------|----------|----------|----------|----------|--------------------|--------------------|
| 8-10 am | 10-12 am | 12-14 pm  | 14-16 pm | 16-18 pm | 18-20 pm | 20-22 pm | 22-24 pm | Next day<br>0-4 am | Nexr day<br>4-8 am |
|         |          |           |          |          |          |          |          |                    |                    |

C5. What is your main travel style when you travel < 3 km from your house?

- (0)  Walk                      (1)  Bicycle                      (2)  Motorcycle  
 (3)  Public bus                      (4)  Car                      (5)  Seldom travel

C6. How many hours do you spend on traveling each day?

- (0)  0 h      (1)  0-0.5 h      (2)  0.5-1 h      (3)  1-1.5 h  
 (4)  1.5-2 h      (5)  2-3 h      (6)  > 3 h

C7. How often do you perform outdoor exercises for longer than 30 minutes per week? \_\_\_\_\_ times

C8. What kind of transportation do you use when you go to work (if any)? How long does it take?

- (0)  Walk                      average time \_\_\_\_\_ min  
 (1)  Bicycle, tricycle                      average time \_\_\_\_\_ min  
 (2)  Electric bicycles, motorcycles                      average time \_\_\_\_\_ min  
 (3)  Bus, private car, taxi                      average time \_\_\_\_\_ min

The interview is over. Thank you for your cooperation again!



**2016**

**Assessing Air Pollution Exposures in southern West Africa  
- Questionnaire for Students**

1. Participant name: \_\_\_\_\_
2. Interviewer name: \_\_\_\_\_
3. Sampling site: \_\_\_\_\_
4. Address of the interview place: \_\_\_\_\_  
\_\_\_\_\_
5. Address of the participant home: \_\_\_\_\_  
\_\_\_\_\_
6. Interview date: \_\_\_\_/\_\_\_\_/\_\_\_\_ (yyyy/mm/dd)
7. Interview start time: \_\_\_\_\_ End time: \_\_\_\_\_

**This questionnaire is for research purposes only. Please think carefully and answer all the questions below. Your answers will be kept completely confidential and your personal information will not be disclosed or displayed in any way and any case.**

**Thank you for your cooperation!**

## A. Basic Information

【Please choose by  or fill in the answer】

A1. Gender: (0)  Male (1)  Female

A2. Age: \_\_\_\_\_ years old

A3. Height: \_\_\_\_\_ cm

A4. Weight: \_\_\_\_\_ Kg

A5. Grade: \_\_\_\_\_ grade

A6. The total number of family members  
(including you): \_\_\_\_\_

A7. Number of adults (18 years or older): \_\_\_\_\_

A8. Your housing type:

(3)  Apartment

(4)  One-storey house

(5)  Other: \_\_\_\_\_

↳ A9. \_\_\_\_\_ Floor

A10. Residential area: \_\_\_\_\_ m<sup>2</sup>

(4)  One room and one hall

(5)  Two rooms and one hall

(6)  Three rooms and two halls

(7)  Others

A11. How many years have you lived in this  
house? \_\_\_\_\_ (year)

A12. What material is your house built?

(0)  Brick (1)  Armored concrete

(2)  Timber (3)  Other materials

A13. What is the material of the floor in your  
house?

(0)  Cement (1)  Marble

(2)  Solid wood (3)  Composite wood

(4)  Tile (5)  Plastic (6)  Rock

(7)  Brick (8)  Bare soil

A14. What is the material of the furniture in  
your house?

(0)  Solid wood (1)  Plastic

(2)  Leather (3)  Metal

(4)  Stone (5)  Glass

(6)  Cloth (7)  Artificial board

A15. Has your house been decorated in the last  
year?

(1)  Yes (1)  No

↳ A16. What kind of decoration?

(0)  Paint

(1)  Change the floor

(2)  Add new furniture

(3)  Other: \_\_\_\_\_

A17. Does your house have ventilation equipment?

(1)  Yes (1)  No

↳ A18. What kind of equipment? (Please  
select all suitable answers)

(0)  Hanging air conditioner

(1)  Cabinet air conditioner

(2)  Ventilator

A19. How far is your house from the main road?

(0)  <20m (1)  20-100m

(2)  >100m

A20. Does your classroom have ventilation  
equipment?

(0)  Yes (1)  No

↳ A21. What kind of equipment? (Please  
select all suitable answers)

(0)  Hanging air conditioner

(1)  Cabinet air conditioner

(2)  Ventilator

**A22. How far is your classroom from the main road?**

- (0)  <20m      (1)  20-100m  
(2)  >100m

**A23. Do you smoke?**

- (0)  Yes      (1)  No

**A24. Does your family member smoke (not including you)?**

- (0)  Yes      (1)  Used to smoke  
(2)  No

**A25. In general, are you influenced by second hand smoke in the following environments often?**

- (0)  Your own home  
(1)  Working environment  
(2)  Other' house  
(3)  Restaurants, bars, supermarkets,

streets and so on

- (4)  Other: \_\_\_\_\_  
(5)  Rarely affected by second hand

smoke

**A26. Do you often drink alcohol?**

- (0)  Yes      (1)  No      (2)  Not often

**A27. Mainly drinking type:**

- (0)  Alcohol      (1)  Beer  
(2)  Wine      (3)  Other

**A28. Please describe your health status in general.**

- (0)  Very good      (1)  Good  
(2)  Not bad      (3)  Not good

**A29. Do you have a family history of allergies?**

- (0)  Yes      (1)  No      (2)  I don't know

**A30. Have you been allergic to flowers or animals, food, etc.?**

- (0)  Yes      (1)  No      (2)  I don't know

**A31. Have you ever had itchy skin and red patches (rashes) lasting more than 6 months?**

- (0)  Yes      (1)  No      (2)  I don't know

**A32. Do your parents have asthma?**

- (0)  Yes      (1)  No      (2)  I don't know

**A33. Do you have asthma?**

- (0)  Yes      (1)  No      (2)  I don't know

**A34. Have you heard any noise or wheeze in your chest (whistle sound) during breathing?**

- (0)  Yes      (1)  No      (2)  I don't know

**A35. Have you had symptoms of sneezing, runny nose or stuffy nose in the absence of a cold?**

- (0)  Yes      (1)  No      (2)  I don't know

## **B. Environment**

【Please choose by  or fill in the answer】

**B1. Do you cook at home?**

- (0)  Yes      (1)  No

↳ **B2. Cooking frequency per day:**

- (0)  Once      (1)  Twice  
(2)  Three times  
(3)  > Three times

**B3. What kind of fuel is used at home for cooking? (Please select all suitable answers)**

- (0)  Natural gas  
(1)  Coal  
(2)  Liquefied petroleum gas (LPG)  
(3)  Electricity  
(4)  Other: \_\_\_\_\_  
(5)  Don't cook at home

**B4. Does your kitchen have ventilation equipment?**

- (0)  Yes      (1)  No

↳ **B5. What kind of equipment? (Please select all suitable answers)**

- (0)  Kitchen smoke exhaust ventilator  
(1)  Kitchen ventilator  
(2)  Chimney

**B6. Your kitchen area: \_\_\_\_\_ m<sup>2</sup>**

**B7. Does your family usually make smoked fish?**

- (0)  Yes      (1)  No

**B8. How many times does your family eat smoked fish per week? \_\_\_\_\_ times.**

**B9. Do you raise pet at home?**

- (0)  Yes      (1)  No

**B10. Do you grow flowers or plants at home?**

- (0)  Yes      (1)  No

**B11. Do you use insecticide at home?**

- (0)  Yes    (1)  No    (2)  I don't know

**B12. What's the open conditions of your windows at home every day?**

- (0)  Wide open < 1h  
(1)  Wide open > 3h  
(2)  Half open < 1h  
(3)  Half open > 3h  
(4)  Never open

**B13. What's the open conditions of your windows at classroom every day?**

- (0)  Wide open < 1h  
(1)  Wide open > 3h  
(2)  Half open < 1h  
(3)  Half open > 3h  
(4)  Never open

**B14. What tool does your family use to clean house?**

- (2)  Broom and mop  
(3)  Electric dust collector

**B15. What tool does your class use to clean classroom?**

- (0)  Broom and mop  
(1)  Electric dust collector

**B16. How far does dumps away from your house? \_\_\_\_\_ m**

**Walking time:**

- (0)  < 5min  
(1)  5-10min  
(2)  10-15min  
(3)  15-20min  
(4)  20-30 min  
(5)  > 30 min

**B17. How far does dumps away from your school? \_\_\_\_\_ m**

**Walking time:**

- (0)  < 5min
- (1)  5-10min
- (2)  10-15min
- (3)  15-20min
- (4)  20-30 min
- (5)  > 30 min

**B18. Can you see waste burning at home?**

- (0)  Yes
- (1)  No

↳ **B19. How many times per week?**

\_\_\_\_\_ times

**B20. Can you see waste burning at school?**

- (0)  Yes
- (1)  No

↳ **B21. How many times per week?**

\_\_\_\_\_ times

**B22. Can you smell smoke from waste burning at home?**

- (0)  Yes
- (1)  No

**B23. Can you smell smoke from waste burning at school?**

- (0)  Yes
- (1)  No

**B24. How to deal with your home waste?**

- (0)  Throwing to dumps
- (1)  Burning by yourselves
- (2)  I don't know

**B25. Does waste burning in dumps impact on your live?**

- (0)  Yes
- (1)  No

↳ **B26. What specific performance?**

(Please select all suitable answers)

(0)  Road congestion, inconvenient travel

(1)  Air odor, black smoke filled

(2)  Air pollution, low visibility

(3)  Water pollution, fish and shrimp death

**B27. Does waste burning in dumps impact on your health?**

- (0)  Yes
- (1)  No

↳ **B28. What specific performance?**

(Please select all suitable answers)

(0)  Congestion, runny nose

(1)  Dry eyes, tears

(2)  Skin allergies

(3)  Throat dry, inflamed

(4)  Difficulty breathing

(5)  Other: \_\_\_\_\_

## C. Travel habits

【Please choose by  or fill in the answer】

**C1. How much time do you spend indoors per day, except sleeping?**

- (0)  > 50%      (1)  = 50%      (2)  < 50%

**C2. How much sleep do you have daily, including daytime and nighttime? \_\_\_\_\_ h**

**C3. What time of the day do you stay in your house in general? (Please select all suitable answers)**

| Morning |          | Afternoon |          |          | Evening  |          |          |                    |                    |
|---------|----------|-----------|----------|----------|----------|----------|----------|--------------------|--------------------|
| 8-10 am | 10-12 am | 12-14 pm  | 14-16 pm | 16-18 pm | 18-20 pm | 20-22 pm | 22-24 pm | Next day<br>0-4 am | Nexr day<br>4-8 am |
|         |          |           |          |          |          |          |          |                    |                    |

**C4. What time of the day do you stay at school in general? (Please select all suitable answers)**

| Morning |          | Afternoon |          |          | Evening  |          |          |                    |                    |
|---------|----------|-----------|----------|----------|----------|----------|----------|--------------------|--------------------|
| 8-10 am | 10-12 am | 12-14 pm  | 14-16 pm | 16-18 pm | 18-20 pm | 20-22 pm | 22-24 pm | Next day<br>0-4 am | Nexr day<br>4-8 am |
|         |          |           |          |          |          |          |          |                    |                    |

**C5. What is your main travel style when you travel < 3 km from your house?**

- (0)  Walk                      (1)  Bicycle                      (2)  Motorcycle  
 (3)  Public bus                      (4)  Car                      (5)  Seldom travel

**C6. How many hours do you spend on traveling each day?**

- (0)  0 h      (1)  0-0.5 h      (2)  0.5-1 h      (3)  1-1.5 h  
 (4)  1.5-2 h      (5)  2-3 h      (6)  > 3 h

**C7. How often do you perform outdoor exercises for longer than 30 minutes per week? \_\_\_\_\_ times**

**C8. What kind of transportation do you use when you go to school? How long does it take?**

- (0)  Walk                      average time \_\_\_\_\_ min  
 (1)  Bicycle, tricycle                      average time \_\_\_\_\_ min  
 (2)  Electric bicycles, motorcycles                      average time \_\_\_\_\_ min  
 (3)  Bus, private car, taxi                      average time \_\_\_\_\_ min

**The interview is over. Thank you for your cooperation again!**

**2016**

**Assessing Air Pollution Exposures in southern West Africa  
- Questionnaire for Drivers**

1. Participant name: \_\_\_\_\_
2. Interviewer name: \_\_\_\_\_
3. Sampling site: \_\_\_\_\_
4. Address of the interview place: \_\_\_\_\_  
\_\_\_\_\_
5. Address of the participant home: \_\_\_\_\_  
\_\_\_\_\_
6. Interview date: \_\_\_\_/\_\_\_\_/\_\_\_\_ (yyyy/mm/dd)
7. Interview start time: \_\_\_\_\_ End time: \_\_\_\_\_

**This questionnaire is for research purposes only. Please think carefully and answer all the questions below. Your answers will be kept completely confidential and your personal information will not be disclosed or displayed in any way and any case.**

**Thank you for your cooperation!**

## A. Basic Information

【Please choose by  or fill in the answer】

A1. Gender: (0)  Male (1)  Female

A2. Age: \_\_\_\_\_ years old

A3. Height: \_\_\_\_\_ cm; Weight: \_\_\_\_\_ Kg

A4. Marital status:

- (0)  Single (1)  Married  
(2)  Divorced (3)  Widowed

A5. Highest level of education:

- (5)  Primary school  
(6)  Junior high school  
(7)  High school  
(8)  Undergraduate  
(9)  Above undergraduate

A6. The total number of family members (including you): \_\_\_\_\_

A7. Number of adults (18 years or older; including you): \_\_\_\_\_

A8. Family total annual income: \_\_\_\_\_ West African Franc / Month

A9. Which kind of car do you drive when you work?

- (0)  Motorcycle (1)  Car  
(2)  Tricycle (3)  Others \_\_\_\_\_

A10. As a driver, how long do you work per day?

- (0)  < 1h  
(1)  1-3h  
(2)  4-6h  
(3)  7-9h  
(4)  10-12h  
(5)  >12h

A11. Your housing type:

- (6)  Apartment  
(7)  One-storey house  
(8)  Other: \_\_\_\_\_

↳A12. \_\_\_\_\_ Floor

A13. Residential area: \_\_\_\_\_ m<sup>2</sup>

- (8)  One room and one hall  
(9)  Two rooms and one hall  
(10)  Three rooms and two halls  
(11)  Others

A14. How long did you move in this house after it was decorated?

- (0)  < 3 months (1)  3-6 months  
(2)  6-12 months (3)  > 12 months

A15. When was your house built? \_\_\_\_\_ (year)

A16. How many years have you lived in this house? \_\_\_\_\_ (year)

A17. What material is your house built?

- (0)  Brick (1)  Armored concrete  
(2)  Timber (3)  Other materials

A18. What is the material of the floor in your house?

- (0)  Cement (1)  Marble  
(2)  Solid wood (3)  Composite wood  
(4)  Tile (5)  Plastic (6)  Rock  
(7)  Brick (8)  Bare soil

A19. What is the material of the furniture in your house?

- (0)  Solid wood (1)  Plastic  
(2)  Leather (3)  Metal  
(4)  Stone (5)  Glass  
(6)  Cloth (7)  Artificial board

A20. Has your house been decorated in the last year?

- (2)  Yes (1)  No

↳A21. What kind of decoration?

- (0)  Paint  
(1)  Change the floor  
(2)  Add new furniture  
(3)  Other: \_\_\_\_\_

A22. Does your house have ventilation equipment?



(2)  Yes (1)  No

↳ A23. What kind of equipment?

(Please select all suitable answers)

(0)  Hanging air conditioner

(1)  Cabinet air conditioner

(2)  Ventilator

A24. How far is your house from the main road?

(0)  < 20m (1)  20-100m

(2)  > 100m

A25. Do you smoke?

(0)  Yes (1)  No

A26. Do you have a smoking history?

(0)  Yes (1)  No

↳ A27. How long is your smoking history? \_\_\_\_\_ (year)

A28. Does your family member smoke (not including you)?

(0)  Yes (1)  Used to smoke

(2)  No

A29. In general, are you influenced by second hand smoke in the following environments often?

(0)  Your own home

(1)  Working environment

(2)  Other' house

(3)  Restaurants, bars, supermarkets,

streets and so on

(4)  Other: \_\_\_\_\_

(5)  Rarely affected by second hand

smoke

A30. Do you often drink alcohol?

(0)  Yes (1)  No

(2)  Not often (3)  Already abstaining

A31. Mainly drinking type:

(0)  Alcohol (1)  Beer

(2)  Wine (3)  Other

A32. Drinking frequency per week (If any):

\_\_\_\_\_ times.

A33. Please describe your health status in general.

(0)  Very good (1)  Good

(2)  Not bad (3)  Not good

A34. Do you have a family history of allergies?

(0)  Yes (1)  No (2)  I don't know

A35. Have you been allergic to flowers or animals, food, etc.?

(0)  Yes (1)  No (2)  I don't know

A36. Have you ever had itchy skin and red patches (rashes) lasting more than 6 months?

(0)  Yes (1)  No (2)  I don't know

A37. Do your parents have asthma?

(0)  Yes (1)  No (2)  I don't know

A38. Do you have asthma?

(0)  Yes (1)  No (2)  I don't know

A39. Have you heard any noise or wheeze in your chest (whistle sound) during breathing?

(0)  Yes (1)  No (2)  I don't know

A40. Have you had symptoms of sneezing, runny nose or stuffy nose in the absence of a cold?

(0)  Yes (1)  No (2)  I don't know

A41. Are you diagnosed with high blood pressure by your doctor?

(0)  Yes (1)  No (2)  I don't know

↳ A42. Are you taking antihypertensive drugs every day?

(0)  Yes (1)  No

A43. Are you diagnosed with diabetes by your doctor?

(0)  Yes (1)  No (2)  I don't know

A44. Are you diagnosed with a myocardial infarction by your doctor?

(0)  Yes (1)  No (2)  I don't know

## **B. Environment**

【Please choose by  or fill in the answer】

**B1. Do you cook at home?**

- (0)  Yes      (1)  No

↳ **B2. Cooking frequency per day:**

- (0)  Once      (1)  Twice  
(2)  Three times  
(3)  > Three times

**B3. What kind of fuel is used at home for cooking? (Please select all suitable answers)**

- (0)  Natural gas  
(1)  Coal  
(2)  Liquefied petroleum gas (LPG)  
(3)  Electricity  
(4)  Other: \_\_\_\_\_  
(5)  Don't cook at home

**B4. Does your kitchen has ventilation equipment?**

- (0)  Yes      (1)  No

↳ **B5. What kind of equipment? (Please select all suitable answers)**

- (0)  Kitchen smoke exhaust ventilator  
(1)  Kitchen ventilator  
(2)  Chimney

**B6. Your kitchen area: \_\_\_\_\_ m<sup>2</sup>**

**B7. Do you cook at home?**

- (0)  Yes      (1)  No

**B8. Does your family usually make smoked fish?**

- (0)  Yes      (1)  No

**B9. How many times do you eat smoked fish at home per week? \_\_\_\_\_ times.**

**B10. Do you raise pet at home?**

- (0)  Yes      (1)  No

**B11. Do you grow flowers or plants at home?**

- (0)  Yes      (1)  No

**B12. Do you use insecticide at home?**

- (0)  Yes      (1)  No      (2)  I don't know

**B13. What's the open conditions of your windows at home every day?**

- (0)  Wide open < 1h  
(1)  Wide open > 3h  
(2)  Half open < 1h  
(3)  Half open > 1h  
(4)  Never open

**B14. What tool do you use to clean house?**

- (4)  Broom and mop  
(5)  Electric dust collector

**B15. What kind of road do you usually drive on?**

(Please select all suitable answers)

- (0)  Unsurfaced road      (1)  Stone road  
(2)  Asphalt road      (3)  Cement road  
(4)  Others: \_\_\_\_\_

**B16. What kind of environment do you usually drive on? (Please select all suitable answers)**

- (0)  Business district      (1)  Industrial area  
(2)  Residential area      (3)  Suburbs  
(4)  Others: \_\_\_\_\_

**B17. What type of power does your motorcycle use?**

- (0)  Diesel      (1)  Gasoline  
(2)  Manpower      (3)  Electricity

**B18. When do you usually work with motorcycle?**

- (0)  Daytime      (1)  Nighttime  
(2)  Morning rush hour  
(3)  Night rush hour

**B19. What is the main purpose of your driving**

motorcycle?

- (0)  Freight      (1)  Passenger  
(2)  Both of above    (3)  Others\_\_\_\_\_

**B20. How far do you drive motorcycle per day?**

\_\_\_\_\_Km

**B21. How do you feel about the surrounding air when driving every day?**

- (0)  Very good      (1)  Good  
(2)  Not bad      (3)  Bad

**B22. Can you smell the exhaust when driving every day?**

- (0)  Yes      (1)  No

**B23. Do you wear a helmet when driving every day (if applicable)?**

- (0)  Yes      (1)  No

## C. Travel habits

【Please choose by  or fill in the answer】

C1. How much time do you spend indoors per day, except sleeping?

(0)  > 50%      (1)  = 50%      (2)  < 50%

C2. How much sleep do you have daily, including daytime and nighttime? \_\_\_\_\_ h

C3. What time of the day do you stay in your house in general? (Please select all suitable answers)

| Morning |          | Afternoon |          |          | Evening  |          |          |                    |                    |
|---------|----------|-----------|----------|----------|----------|----------|----------|--------------------|--------------------|
| 8-10 am | 10-12 am | 12-14 pm  | 14-16 pm | 16-18 pm | 18-20 pm | 20-22 pm | 22-24 pm | Next day<br>0-4 am | Nexr day<br>4-8 am |
|         |          |           |          |          |          |          |          |                    |                    |

C4. What time of the day do you drive cars for work in general? (Please select all suitable answers)

| Morning |          | Afternoon |          |          | Evening  |          |          |                    |                    |
|---------|----------|-----------|----------|----------|----------|----------|----------|--------------------|--------------------|
| 8-10 am | 10-12 am | 12-14 pm  | 14-16 pm | 16-18 pm | 18-20 pm | 20-22 pm | 22-24 pm | Next day<br>0-4 am | Nexr day<br>4-8 am |
|         |          |           |          |          |          |          |          |                    |                    |

C5. What is your main travel style when you travel < 3 km from your house?

(0)  Walk      (1)  Bicycle      (2)  Motorcycle  
 (3)  Public bus      (4)  Car      (5)  Seldom travel

C6. How often do you perform outdoor exercises for longer than 30 minutes per week?  
 \_\_\_\_\_ times

The interview is over. Thank you for your cooperation again!

**SI D.**

2016

Assessing Air Pollution Exposures in  
southern West Africa

**DETAILED TIME-ACTIVITY DIARY**

**Participant name:** \_\_\_\_\_

**Start date:** \_\_/\_\_/\_\_      **Time:** \_\_:\_\_

**MM/DD/YY**

**End date:** \_\_/\_\_/\_\_      **Time:** \_\_:\_\_

**MM/DD/YY**

**Interviewer name:** \_\_\_\_\_

## DETAILED ACTIVITY DIARY FOR WOMAN

| Time                                                                                                                                                                                                                                                                                                                                                                                                                                    | Location<br>(mark all that apply)                                                                                                                                                                                                                                                                                                                                                                                      | Activities<br>(mark all that apply)                                                                                                                                                                                                                                                                                                                                                                                                                                                                                                                                           |
|-----------------------------------------------------------------------------------------------------------------------------------------------------------------------------------------------------------------------------------------------------------------------------------------------------------------------------------------------------------------------------------------------------------------------------------------|------------------------------------------------------------------------------------------------------------------------------------------------------------------------------------------------------------------------------------------------------------------------------------------------------------------------------------------------------------------------------------------------------------------------|-------------------------------------------------------------------------------------------------------------------------------------------------------------------------------------------------------------------------------------------------------------------------------------------------------------------------------------------------------------------------------------------------------------------------------------------------------------------------------------------------------------------------------------------------------------------------------|
| x:00 am-x:30 am*<br><br>Pollution sources<br><input type="checkbox"/> Environmental tobacco smoke<br><input type="checkbox"/> Cooking<br><input type="checkbox"/> smoking fish<br><input type="checkbox"/> no smoking fish<br><input type="checkbox"/> Use of cleaning products<br><input type="checkbox"/> House decoration<br><input type="checkbox"/> Transportation emissions<br><input type="checkbox"/> Other (specify):<br>_____ | Indoors<br><input type="checkbox"/> Home<br><input type="checkbox"/> kitchen<br><input type="checkbox"/> living room<br><input type="checkbox"/> bedroom<br><input type="checkbox"/> courtyard<br><input type="checkbox"/> Work<br><input type="checkbox"/> Other (specify):<br>_____<br><br>Outdoors<br><input type="checkbox"/> In transit (specify):<br>_____<br><input type="checkbox"/> Other (specify):<br>_____ | <input type="checkbox"/> Cooking<br><input type="checkbox"/> Smoking fish<br><input type="checkbox"/> Cleaning room<br><input type="checkbox"/> Washing the clothes<br><input type="checkbox"/> Taking food<br><input type="checkbox"/> Watching television<br><input type="checkbox"/> Taking a rest<br><input type="checkbox"/> Working at office<br><input type="checkbox"/> Going out<br><input type="checkbox"/> Taking exercise<br><input type="checkbox"/> Shopping<br><input type="checkbox"/> Visiting friends<br><input type="checkbox"/> Other (specify):<br>_____ |

\*X refers to the hour.

## DETAILED ACTIVITY DIARY FOR STUDENT

| Time                                                                                                                                                                                                                                                                                                                                                                                                                                                         | Location<br>(mark all that apply)                                                                                                                                                                                                                                                                                                                                                                                                                                                       | Activities<br>(mark all that apply)                                                                                                                                                                                                                                                                                                                                                                                                                                                                                                                                                                                                     |
|--------------------------------------------------------------------------------------------------------------------------------------------------------------------------------------------------------------------------------------------------------------------------------------------------------------------------------------------------------------------------------------------------------------------------------------------------------------|-----------------------------------------------------------------------------------------------------------------------------------------------------------------------------------------------------------------------------------------------------------------------------------------------------------------------------------------------------------------------------------------------------------------------------------------------------------------------------------------|-----------------------------------------------------------------------------------------------------------------------------------------------------------------------------------------------------------------------------------------------------------------------------------------------------------------------------------------------------------------------------------------------------------------------------------------------------------------------------------------------------------------------------------------------------------------------------------------------------------------------------------------|
| x:00 am-x:30 am*<br><br>Pollution sources<br><input type="checkbox"/> Environmental tobacco smoke<br><input type="checkbox"/> Cooking<br><input type="checkbox"/> smoking fish<br><input type="checkbox"/> no smoking fish<br><input type="checkbox"/> Use of cleaning products<br><input type="checkbox"/> House decoration<br><input type="checkbox"/> Transportation emissions<br><input type="checkbox"/> Other (specify):<br><hr style="width: 100%;"/> | Indoors<br><input type="checkbox"/> Home<br><input type="checkbox"/> kitchen<br><input type="checkbox"/> living room<br><input type="checkbox"/> bedroom<br><input type="checkbox"/> courtyard<br><input type="checkbox"/> School classroom<br><input type="checkbox"/> Other (specify):<br><hr style="width: 100%;"/> Outdoors<br><input type="checkbox"/> In transit (specify):<br><hr style="width: 100%;"/> <input type="checkbox"/> Other (specify):<br><hr style="width: 100%;"/> | <input type="checkbox"/> Cooking<br><input type="checkbox"/> Smoking fish<br><input type="checkbox"/> Cleaning room<br><input type="checkbox"/> Washing the clothes<br><input type="checkbox"/> Taking food<br><input type="checkbox"/> Watching television<br><input type="checkbox"/> Taking a rest<br><input type="checkbox"/> Studying at school<br><input type="checkbox"/> Studying at home<br><input type="checkbox"/> Going out<br><input type="checkbox"/> Taking exercise<br><input type="checkbox"/> Shopping<br><input type="checkbox"/> Playing<br><input type="checkbox"/> Other (specify):<br><hr style="width: 100%;"/> |

\*X refers to the hour.

### DETAILED ACTIVITY DIARY FOR DRIVER

| Time                                                                                                                                                                                                                                                                                                                                                                                                                                                                                                                                       | Location<br>(mark all that apply)                                                                                                                                                                                                                                                                                                                                                                                                                                                                                                                                                                      | Activities<br>(mark all that apply)                                                                                                                                                                                                                                                                                                                                                                                                                                                                                                                                                                                                                                                     |
|--------------------------------------------------------------------------------------------------------------------------------------------------------------------------------------------------------------------------------------------------------------------------------------------------------------------------------------------------------------------------------------------------------------------------------------------------------------------------------------------------------------------------------------------|--------------------------------------------------------------------------------------------------------------------------------------------------------------------------------------------------------------------------------------------------------------------------------------------------------------------------------------------------------------------------------------------------------------------------------------------------------------------------------------------------------------------------------------------------------------------------------------------------------|-----------------------------------------------------------------------------------------------------------------------------------------------------------------------------------------------------------------------------------------------------------------------------------------------------------------------------------------------------------------------------------------------------------------------------------------------------------------------------------------------------------------------------------------------------------------------------------------------------------------------------------------------------------------------------------------|
| <p>x:00 am-x:30 am*</p> <p>Pollution sources</p> <p><input type="checkbox"/> Environmental tobacco smoke</p> <p><input type="checkbox"/> Cooking</p> <p style="padding-left: 20px;"><input type="checkbox"/> smoking fish</p> <p style="padding-left: 20px;"><input type="checkbox"/> no smoking fish</p> <p><input type="checkbox"/> Use of cleaning products</p> <p><input type="checkbox"/> House decoration</p> <p><input type="checkbox"/> Transportation emissions</p> <p><input type="checkbox"/> Other (specify):</p> <p>_____</p> | <p>Indoors</p> <p><input type="checkbox"/> Home</p> <p style="padding-left: 20px;"><input type="checkbox"/> kitchen</p> <p style="padding-left: 20px;"><input type="checkbox"/> living room</p> <p style="padding-left: 20px;"><input type="checkbox"/> bedroom</p> <p style="padding-left: 20px;"><input type="checkbox"/> courtyard</p> <p><input type="checkbox"/> Other (specify):</p> <p>_____</p> <p>Outdoors</p> <p><input type="checkbox"/> In transit (specify):</p> <p>_____</p> <p><input type="checkbox"/> In the street</p> <p><input type="checkbox"/> Other (specify):</p> <p>_____</p> | <p><input type="checkbox"/> Cooking</p> <p><input type="checkbox"/> Smoking fish</p> <p><input type="checkbox"/> Cleaning room</p> <p><input type="checkbox"/> Washing the clothes</p> <p><input type="checkbox"/> Taking food</p> <p><input type="checkbox"/> Watching television</p> <p><input type="checkbox"/> Taking a rest</p> <p><input type="checkbox"/> Driving the MOTO</p> <p><input type="checkbox"/> Driving the car</p> <p><input type="checkbox"/> Going out</p> <p><input type="checkbox"/> Taking exercise</p> <p><input type="checkbox"/> Shopping</p> <p><input type="checkbox"/> Visiting friends</p> <p><input type="checkbox"/> Other (specify):</p> <p>_____</p> |

\*X refers to the hour.
